# Supplementary material for: A novel strategy for the aqueous synthesis of down-/up-conversion nanocomposites for dual-modal cell imaging and drug delivery
Source: Royal Society of Chemistry journal article supplement (doi:10.1039/c4tb01445f), 2014-01-01
Supplement: c4tb01445f1.pdf [file c4tb01445f1.pdf]

**Electronic Supplementary Information For**

**A novel strategy for the aqueous synthesis of down-/up-conversion  
nanocomposites for dual-modal cell imaging and drug delivery**

Peng Zhao,<sup>a</sup> Jing Zhang,<sup>b</sup> Yihua Zhu,<sup>a\*</sup> Xiaoling Yang,<sup>a</sup> Xin Jiang,<sup>a</sup> Yuan Yuan,<sup>b</sup>  
Changsheng Liu<sup>b</sup> and Chunzhong Li<sup>a\*</sup>

*a Key Laboratory for Ultrafine Materials of Ministry of Education, School of  
Materials Science and Engineering, East China University of Science and  
Technology, Shanghai 200237, China.*

*b The State Key Laboratory of Bioreactor Engineering, East China University of  
Science and Technology, Shanghai 200237, PR China*

\*Corresponding author: Tel.: +86-21-64252022, Fax: +86-21-64250624

E-mail address: yhzhu@ecust.edu.cn (Y. Zhu) and czli@ecust.edu.cn (C. Li)

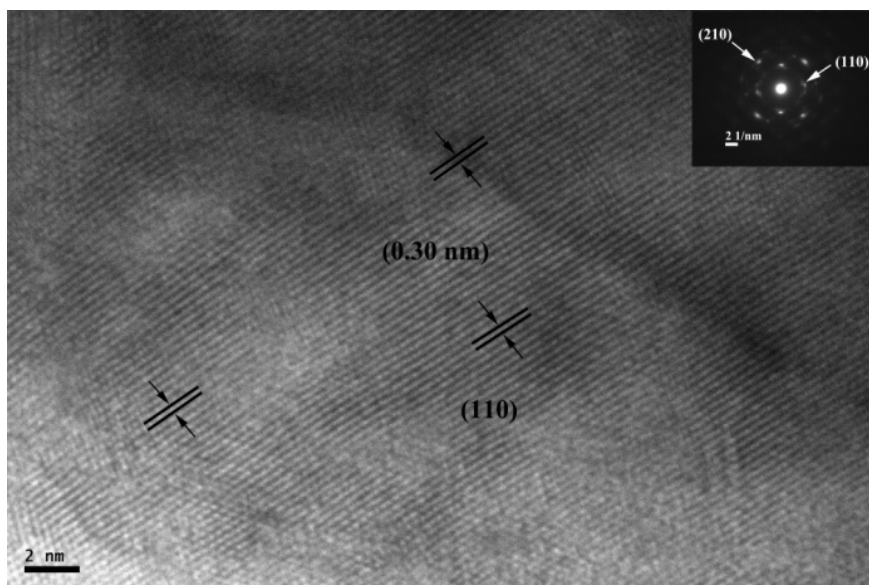

Fig. S1 HRTEM image of NaYF<sub>4</sub>:Yb,Er NPs, inset displays the corresponding SEAD image.

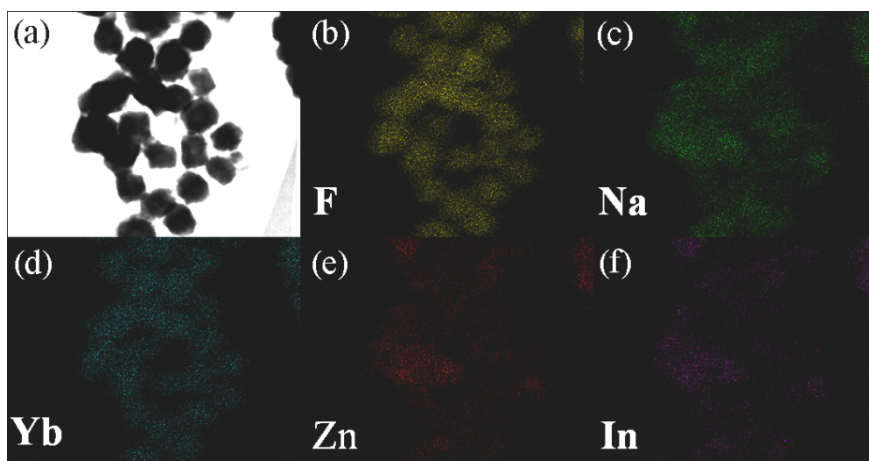

Fig. S2 (a) TEM image obtained from the UCNPs/ZAIS NCs with corresponding EDS maps for (b) F, (c) Na, (d) Yb, (e) Zn, and (f) In.

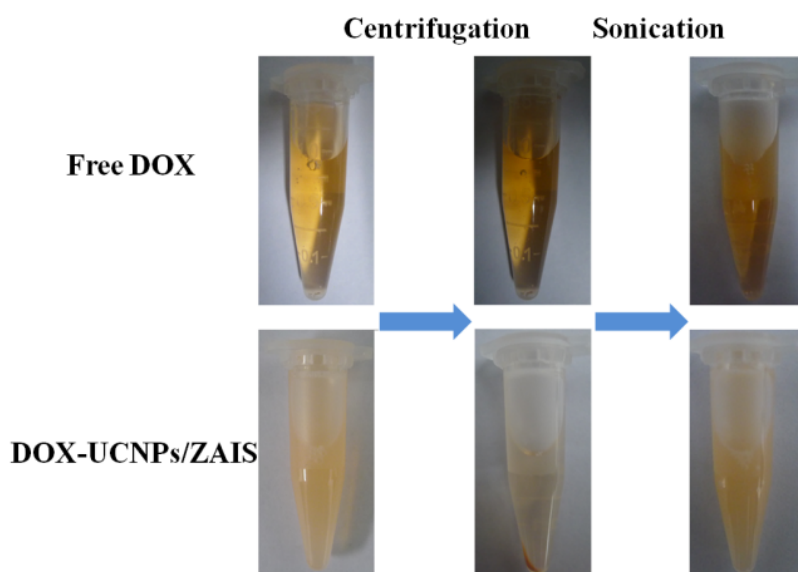

Fig. S3 Photos of free DOX, and DOX-UCNPs/ZAIS solutions after centrifugation and then sonication. DOX was adsorbed by UCNPs/ZAIS, which were precipitated after centrifugation and then re-suspended after a brief sonication.

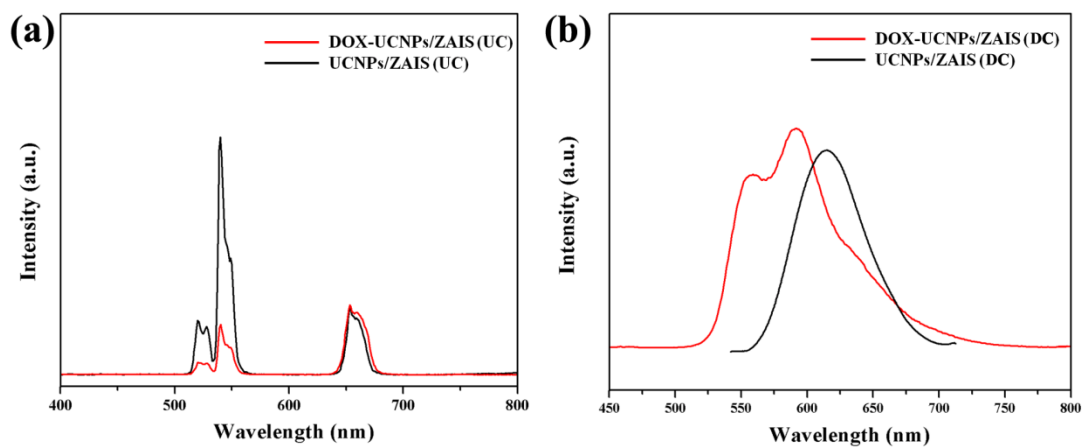

Fig. S4 (a) UC and (b) DC emission spectra of UCNPs/ZAIS and DOX-UCNPs/ZAIS solutions with the same UCNPs/ZAIS concentration ( $0.2 \text{ mg mL}^{-1}$ ) under 980 nm excitation and 365 nm excitation, respectively.

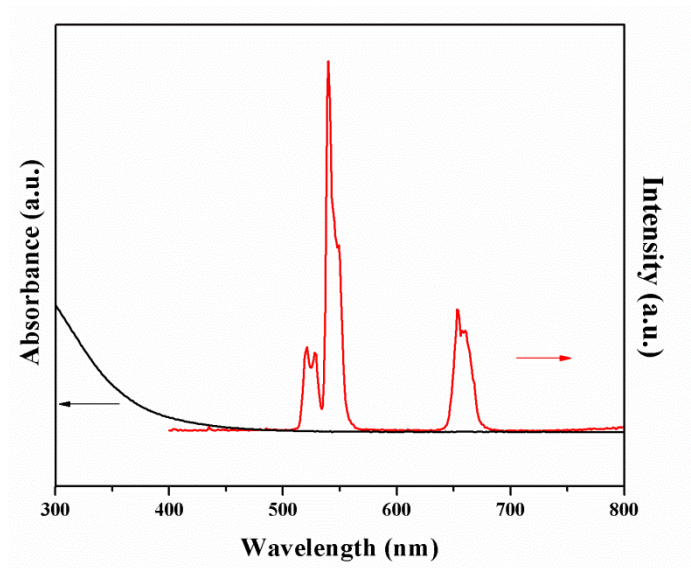

Fig. S5 Absorption spectrum (black line) of ZAIS QDs and the emission spectrum (red line) of the UCNP excited at 980 nm.

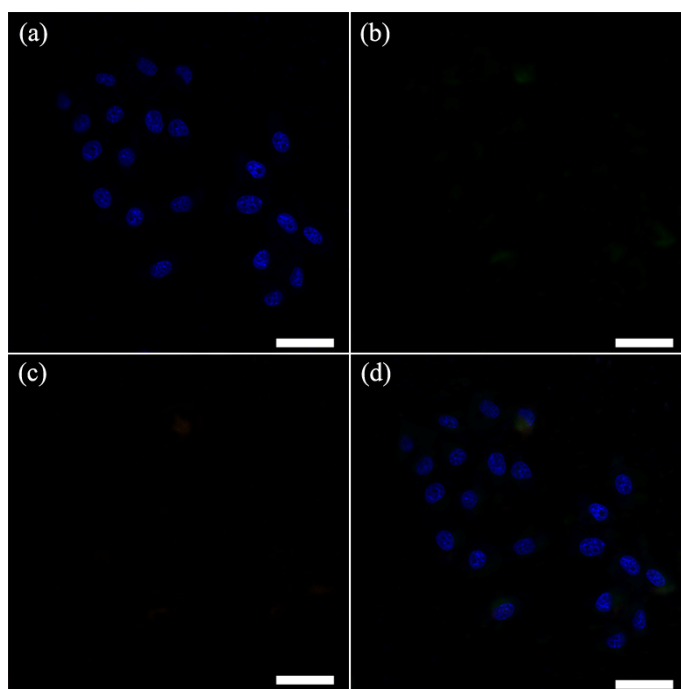

Fig. S6 CLSM images of HeLa cells incubated with UCNP/ZAIS NCs for 1 h at 37 °C. (a) The nucleus stained with DAPI; (b) UC image under 980 nm excitation; (c) DC image under 365 nm excitation; (d) overlay of (a), (b) and (c). All scale bars are 50  $\mu\text{m}$ .
